# Supplementary material for: Differential recognition of a dileucine-based sorting signal by AP-1 and AP-3 reveals a requirement for both BLOC-1 and AP-3 in delivery of OCA2 to melanosomes
Source: PubMed Central journal article supplement — Mol Biol Cell. 2012 Aug 15;23(16):3178–92. doi: 10.1091/mbc.E11-06-0509 (PMC3418312; doi:10.1091/mbc.e11-06-0509), 2012-08-15
Supplement: supp_E11-06-0509_CombinedSupMats.pdf [file supp_E11-06-0509_CombinedSupMats.pdf]

## **SUPPLEMENTARY INFORMATION.**

### **Supplementary Methods**

**Electron microscopy.** Melan-Ink4a cells that were stably transduced with retrovirus to express OCA2-AA23 (following selection with 400  $\mu\text{g}/\text{ml}$  hygromycin) were fixed with 2% paraformaldehyde/ 0.2% glutaraldehyde in PHEM buffer (60 mM PIPES, 25 mM HEPES, 2 mM  $\text{MgCl}_2$ , 10 mM EGTA pH 6.9) and the processed for cryosectioning as described (Raposo *et al.*, 2001). Ultrathin cryosections were prepared with an Ultracut FCS ultracryomicrotome (Leica, Vienna, Austria), and single or double immunogold labeled using a rat anti-HA11 antibody (Roche Diagnostics) with or without rabbit anti- $\gamma$ -adaptin (anti-AP-1; Seaman *et al.*, 1996) and protein A conjugated to 10 – or 15-nm gold (PAG10 or PAG15). Sections were analyzed with a Philips CM120 electron microscope (FEI, Eindhoven, The Netherlands), and digital acquisitions were made with a Keen View numeric camera (Soft Imaging System, Münster, Germany).

### **Supplementary Reference**

Seaman, M. N., Sowerby, P. J., and Robinson, M. S. (1996). Cytosolic and membrane-associated proteins involved in the recruitment of AP-1 adaptors onto the trans-Golgi network. *J. Biol. Chem.* 271, 25446–25451

**Supplementary Table 1.** Conservation of LL1 motifs among OCA2 homologs in vertebrates

| Organism                                             | Protein Accession | First amino acid | Sequence             |
|------------------------------------------------------|-------------------|------------------|----------------------|
| Human ( <i>Homo sapiens</i> )                        | NP_000266         | 96               | ENTPLL               |
| Chimpanzee ( <i>Pan troglodytes</i> )                | XP_001162129      | 96               | ENTPLL               |
| Gibbon ( <i>Nomascus leucogenys</i> )                | XP_003272870      | 96               | ENTPLL               |
| Marmoset ( <i>Callithrix jacchus</i> )               | XP_002806937      | 152              | ENTPLL               |
| Rhesus macaque ( <i>Macaca mulatta</i> )             | XP_002804735      |                  | - <sup>a</sup>       |
| Eur. rabbit ( <i>Oryctolagus cuniculus</i> )         | XP_002718259      | 103              | ENTPLL               |
| Mouse ( <i>Mus musculus</i> )                        | NP_068679         | 92               | EDTPLL               |
| Rat ( <i>Rattus norvegicus</i> )                     | XP_002725672      | 101              | EDTPLL               |
| Pig ( <i>Sus scrofa</i> )                            | NP_999259         | 103              | ENTPLL               |
| Cattle ( <i>Bos taurus</i> )                         | XP_002685246      | 103              | ENTPLL               |
| Horse ( <i>Equus caballus</i> )                      | XP_001494337      | 53               | ENTPLL               |
| Dog ( <i>Canis lupus familiaris</i> )                | XP_545800         | 20               | ENTPLL               |
| Panda ( <i>Ailuropoda melanoleuca</i> )              | XP_002930355      | 49               | ENTPLL               |
| Opossum ( <i>Monodelphis domestica</i> )             | XP_001366525      | 188              | DFGPPLL <sup>a</sup> |
| Chicken ( <i>Gallus gallus</i> )                     | XP_425579         |                  | - <sup>a</sup>       |
| Turkey ( <i>Meleagris gallopavo</i> )                | XP_003203180      | 109              | ERTPLL               |
| Zebra finch ( <i>Taenopygia guttata</i> )            | XP_002194840      | 179              | EKTPLL               |
| Clawed frog ( <i>Xenopus (Silurana) tropicalis</i> ) | XP_002937026      | 106              | EKTPLL               |
| Green anole ( <i>Anolis carolinensis</i> )           | XP_003218820      | 34               | ERSPLL               |
| Mexican cavefish ( <i>Astyanax mexicanus</i> )       | ABB29299          | 97               | ERSPLL               |
| Japanese medaka ( <i>Oryzias latipes</i> )           | NP_001098262      | 101              | ERSPLL               |
| Zebrafish ( <i>Danio rerio</i> )                     | XP_695807         | 97               | ERTPLL               |

Blue residues differ from the human sequence, ENTPLL.

<sup>a</sup>The conservation between these proteins and human OCA2 is very poor throughout the cytoplasmic N-terminal domain or the NCBI database in this region is incomplete.

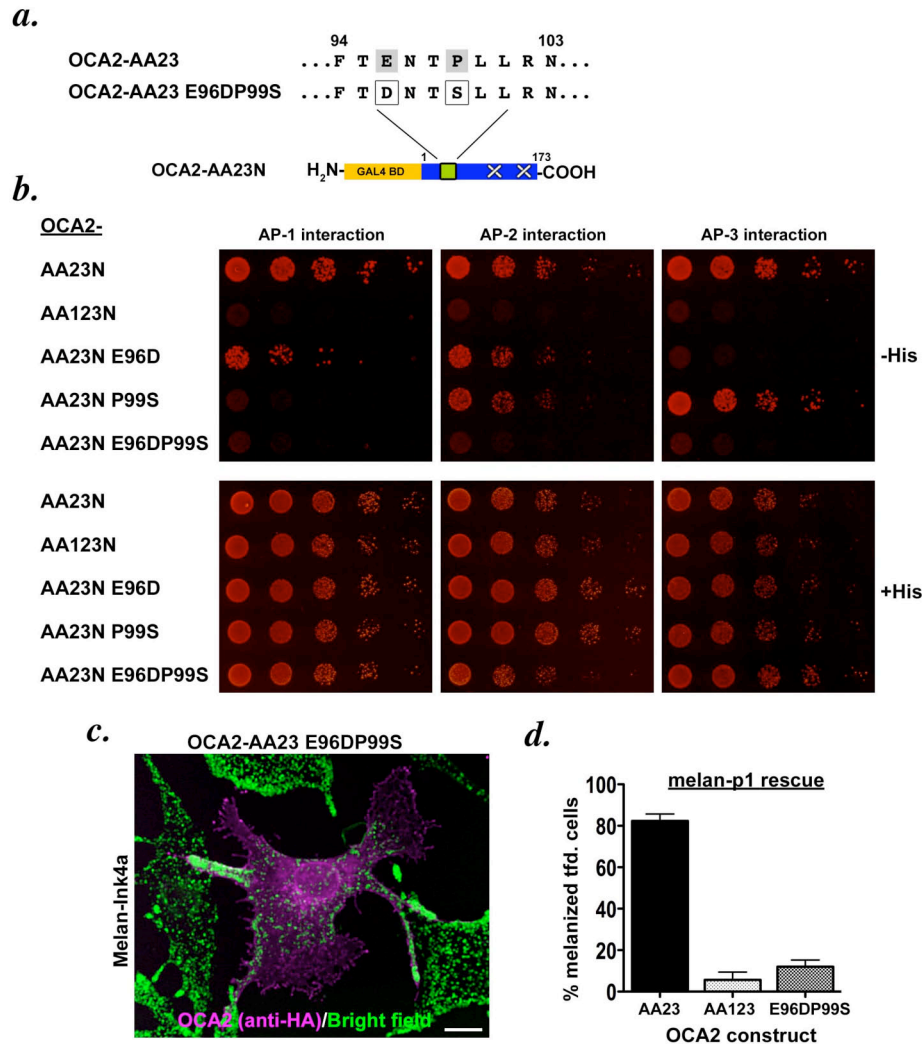

**Supplementary Figure S1. The E96DP99S combined dileucine mutant is nonfunctional.**

(a) The OCA2 LL1 motif was subjected to two amino acid substitutions in the OCA2-AA23N yeast three-hybrid construct to create the OCA2-AA23N E96DP99S mutant. (b) Yeast three-hybrid results show that the E96DP99S construct does not interact with the three AP complexes. (c) Full-length OCA2-AA23 E96DP99S was transiently transfected into melan-Ink4a melanocytes. The transgene is visualized by anti-HA antibodies (magenta) and pigmented melanosomes are visualized by Bright field microscopy (inverted and colored green). Bar = 10  $\mu$ m. (d) OCA2-AA23 E96DP99S was transiently transfected into melan-p1 melanocytes and assayed for rescue of melanin synthesis as in Figure 2j. The graph shows the results from three independent transfections.

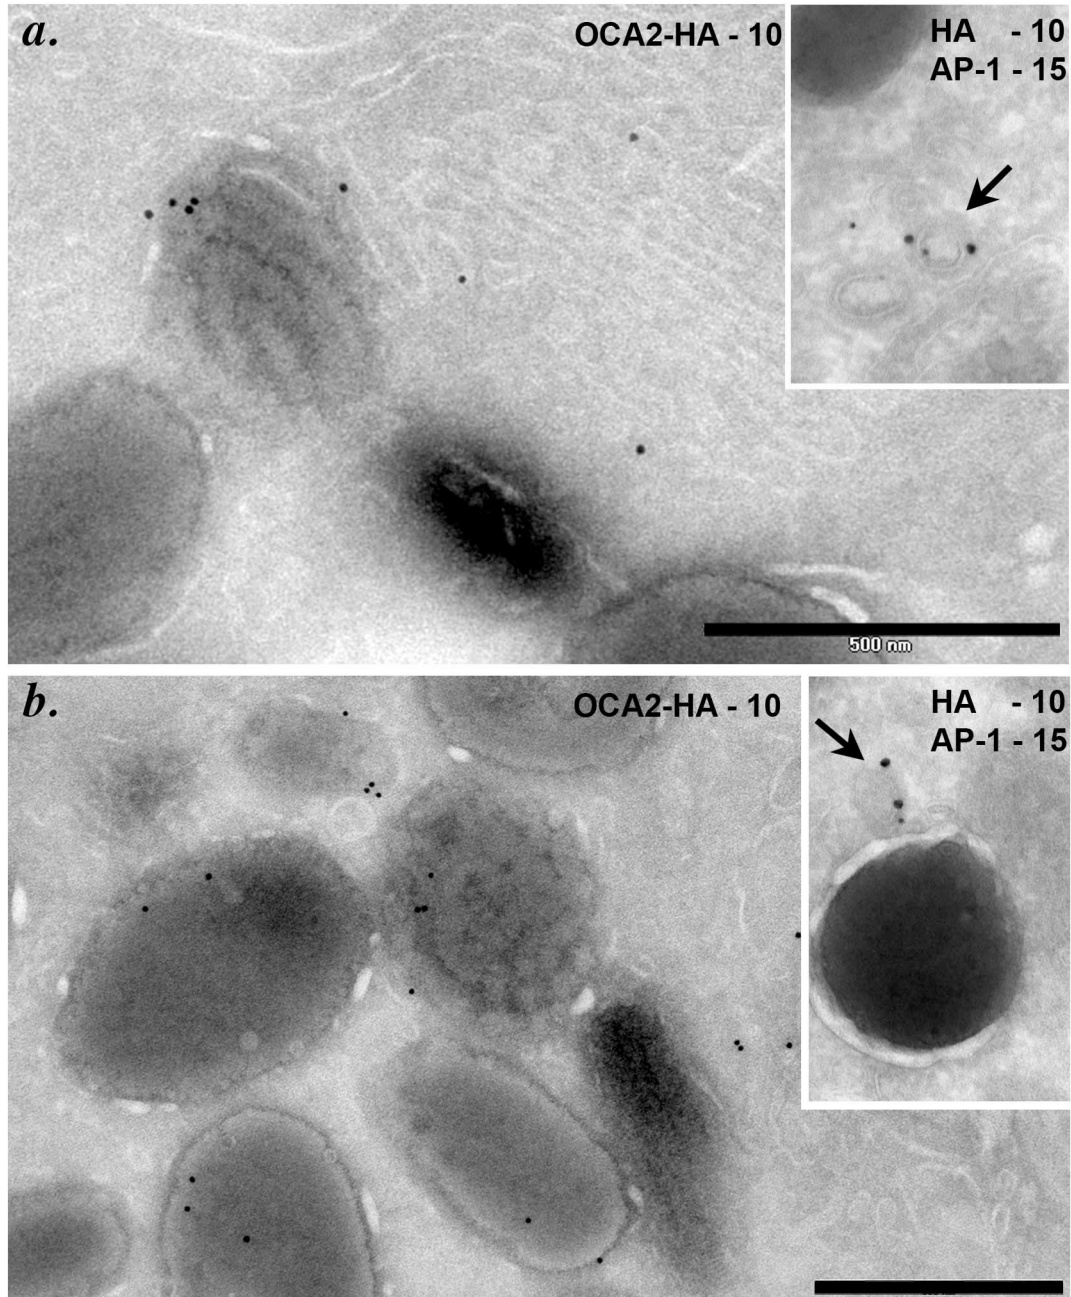

**Supplementary Figure S2. OCA2 localizes to melanosomes, the TGN and AP-1-coated vesicles in melanocytic cells.**

HA-tagged OCA2-AA23 was stably expressed in wild-type melan-ink4a melanocytes after retroviral transduction and selection with hygromycin. Ultrathin cryosections of fixed cells were immunogold labeled with anti-HA and 10 nm protein A gold (OCA2-HA 10) alone (a, b) or with anti- $\gamma$ -adaptin and 15 nm protein A gold (AP-1 15; insets). a, note labeling over the *trans* Golgi network and nearby pigmented melanosomes. b, note the predominant labeling over the lumen

and limiting membrane of melanosomes. Insets, note labeling on coated vesicle structures that are in close proximity with and/ or fusing with melanosomes.

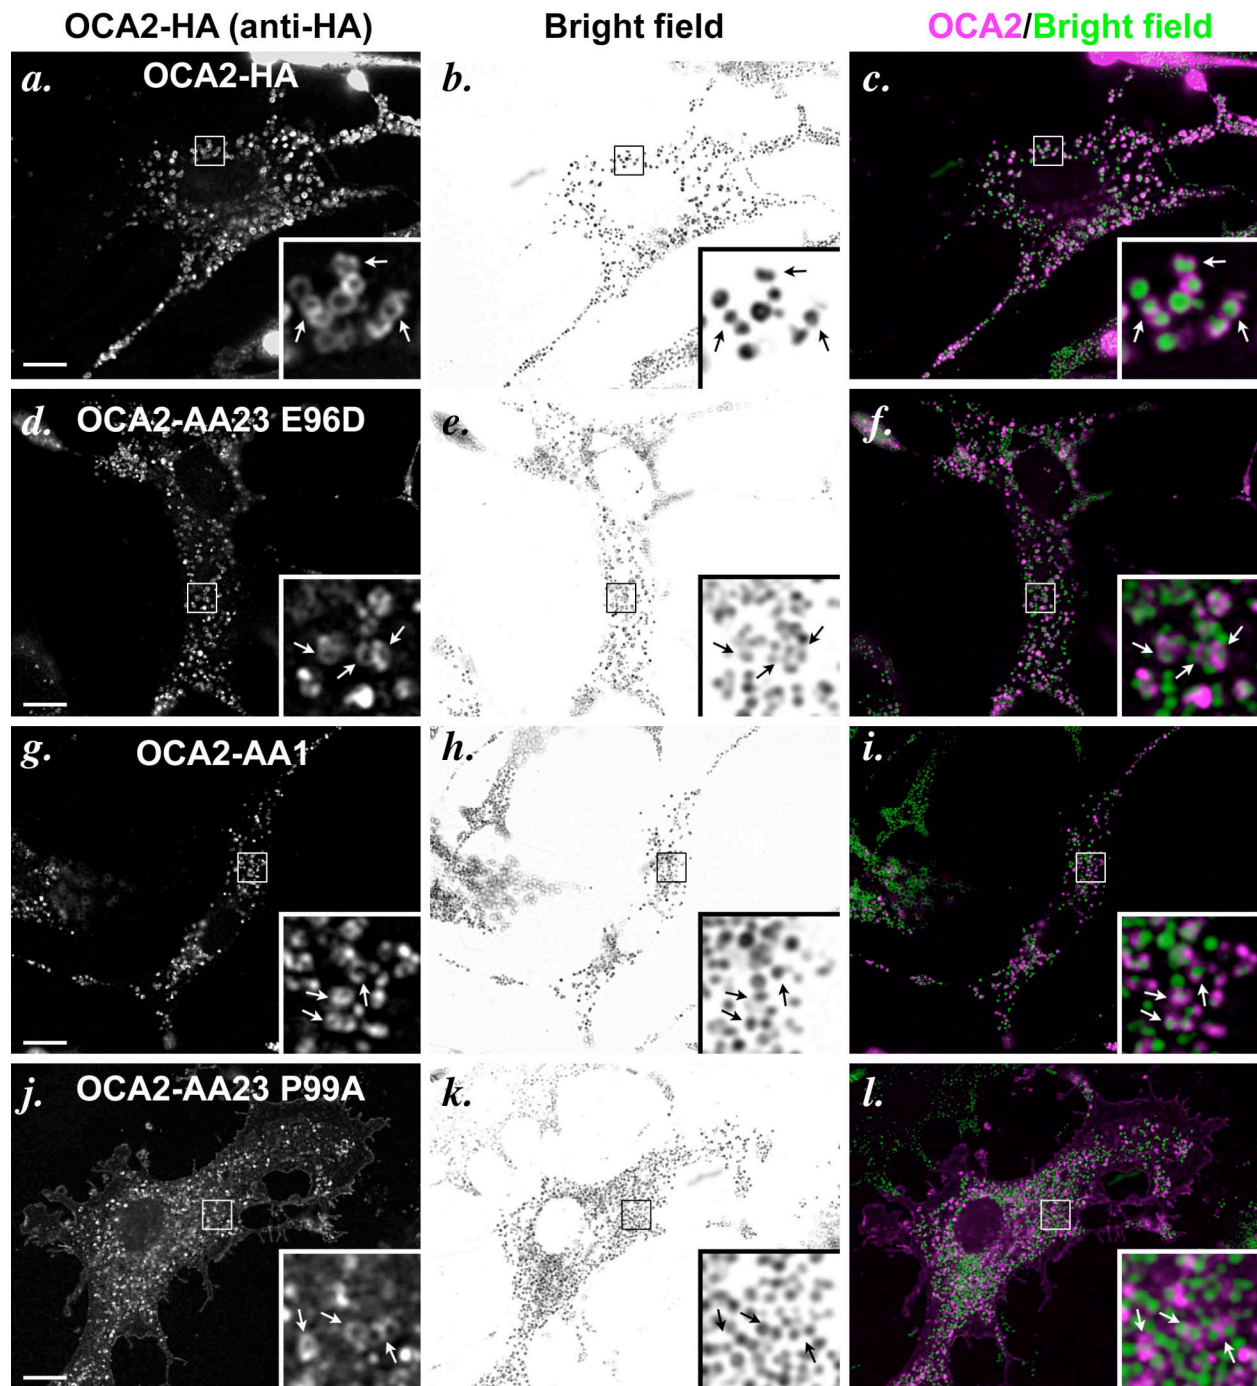

**Supplementary Figure S3. OCA2 variants are trapped on enlarged melanosomes in some AP-3-deficient melanocytes.**

HA-tagged human OCA2 (a-c), OCA2-AA23 E96D (d-f), OCA2-AA1 (g-i), or OCA2-AA23 P99A (j-l) was transiently transfected into AP-3-deficient melan-pe melanocytes. The transgene was visualized with anti-HA antibodies (a, d, g, j) and melanosomes were visualized by Bright

field microscopy (b, e, h, k). OCA2 (magenta) and Bright field (green) images were merged in (c, f, i, l). All insets show 5X magnified images of the boxed region. Arrows point to regions of overlap between OCA2 and pigmented melanosomes. Bar = 10  $\mu\text{m}$ .

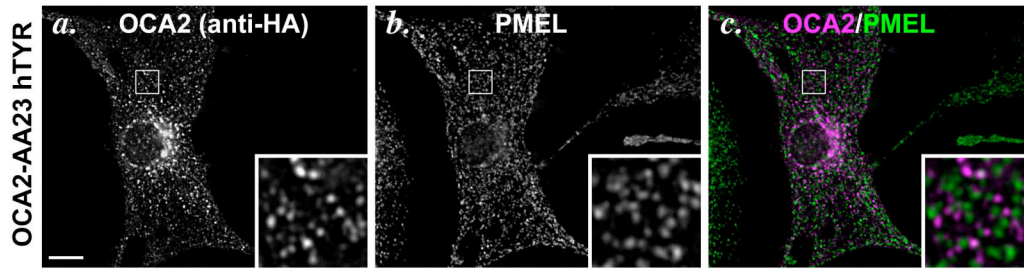

**Supplementary Figure S4. The dileucine motif does not determine BLOC-1 dependence.**

The OCA2-AA23 hTYR construct was transiently transfected into BLOC-1-deficient melanopallid melanocytes. The transgene was visualized with anti-HA antibodies (a) and hypopigmented melanosomes were visualized by antibodies to PMEL (b). OCA2 (magenta) and PMEL (green) images were merged in (c). All insets show 5X magnified images of the boxed region. Bar = 10  $\mu$ m.
